# Supplementary material for: AIE-active non-planar phenothiazine-based derivatives with mechanical-induced emission enhancement characteristics
Source: Royal Society of Chemistry journal article supplement (doi:10.1039/d3nj04486f), 2023-01-01
Supplement: d3nj04486f1.pdf [file d3nj04486f1.pdf]

1  
2  
3  
4  
5  
6  
7  
8  
9  
10  
11  
12  
13  
14  
15  
16  
17  
18  
19  
20  
21  
22  
23  
24  
25  
26  
27  
28  
29  
30

Supporting information for

**AIE-active non-planar phenothiazine-based derivatives with mechanical-induced emission  
enhancement characteristic**

Huizhuan Zhu<sup>a,1</sup>, Jing Zhang<sup>a,1</sup>, Huijuan Zhang<sup>b</sup>, Chuchu Han<sup>a</sup>, Ting Xu<sup>a</sup>, Jiakun Bai<sup>a</sup>,  
Jiang Peng<sup>a</sup>, Junhui Jia<sup>a,\*</sup>

<sup>a</sup> Key Laboratory of Magnetic Molecules and Magnetic Information Material of  
Ministry of Education, School of Chemistry and Material Science, Shanxi Normal  
University, Taiyuan, 030032, PR China

<sup>b</sup> College of Physics and Information Engineering, Shanxi Normal University,  
Taiyuan, 030032, PR China

<sup>1</sup> These authors contributed equally to this work.

## 1 **Experimental section measurements and instruments**

2 All the raw materials were purchased from Energy Chemical Works (China) without  
3 further purification. All the solvents were purchased from Beijing Chemical Works  
4 (Beijing, China) and were of analytical reagent grade; moreover, they were used  
5 without further purification. The  $^1\text{H}$  NMR and  $^{13}\text{C}$  NMR spectra were recorded using  
6 a Mercury Plus instrument at 600 MHz and 151 MHz by using  $\text{CDCl}_3$  as the solvent  
7 in all cases. The HR-MS spectra were recorded using a Bruker Impact II. The UV-vis  
8 absorption spectra were obtained using a VARIAN Cary 5000 spectrophotometer.  
9 The absorption spectra of the solids were obtained by measuring their films on the  
10 surface of a silica plate. Photoluminescence measurements were obtained using a  
11 Cary Eclipse fluorescence spectrophotometer. The fluorescence quantum yields of  
12 EPMBs and EPMMS in solvents were measured by comparing with a standard  
13 (quinine in 0.1 N  $\text{H}_2\text{SO}_4$ ,  $\Phi = 0.546$ ) and the excitation wavelength was 365 nm. The  
14 XRD patterns were obtained using an Empyrean X-ray diffraction instrument  
15 equipped with graphite-monochromatized  $\text{Cu K}\alpha$  radiation ( $\lambda = 1.5418 \text{ \AA}$ ) by  
16 employing a scanning rate of  $0.0261 \text{ s}^{-1}$  in the  $2\theta$  range from 5 to 60. The solid  
17 fluorescence quantum yields and fluorescence lifetimes were measured using an  
18 Edinburgh FLS980 fluorescence spectrophotometer under air at room temperature.  
19 Dynamic light scattering (DLS) measurements were performed on the BI-200SM  
20 Laser Light Scattering System (Brookhaven). FESEM was performed using a JSM-  
21 7500F. The molecular configuration was used to obtain the frontier orbitals of  
22 EPMBs and EPMMS by density functional theory (DFT) calculations at the  
23 B3LYP/6-311G (d,p) level with the Gaussian 09W program package. The filter  
24 papers loaded EPMBs and EPMMS were prepared by evenly spraying their  $\text{CHCl}_3$   
25 solution (5 mg/mL), respectively, and then quickly dried in air.

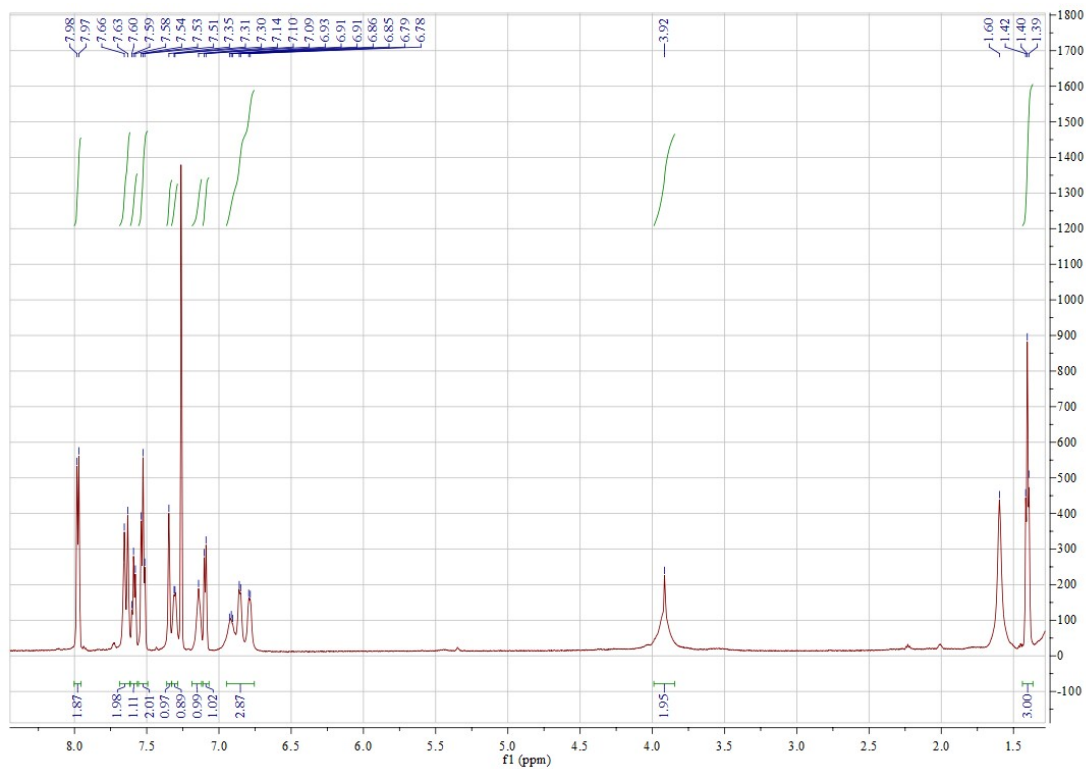

1

2

Fig. S1  $^1\text{H}$  NMR (600 MHz,  $\text{CDCl}_3$ ) of compound EPMBS

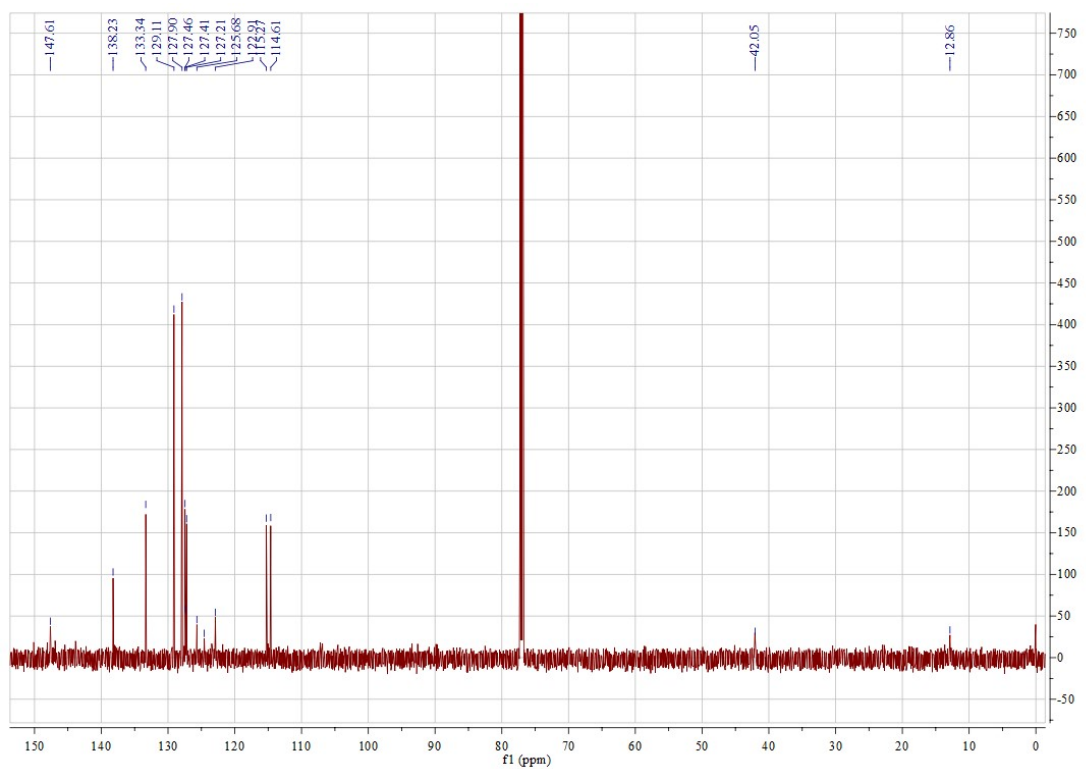

3

4

Fig. S2  $^{13}\text{C}$  NMR (151 MHz,  $\text{CDCl}_3$ ) of compound EPMBS

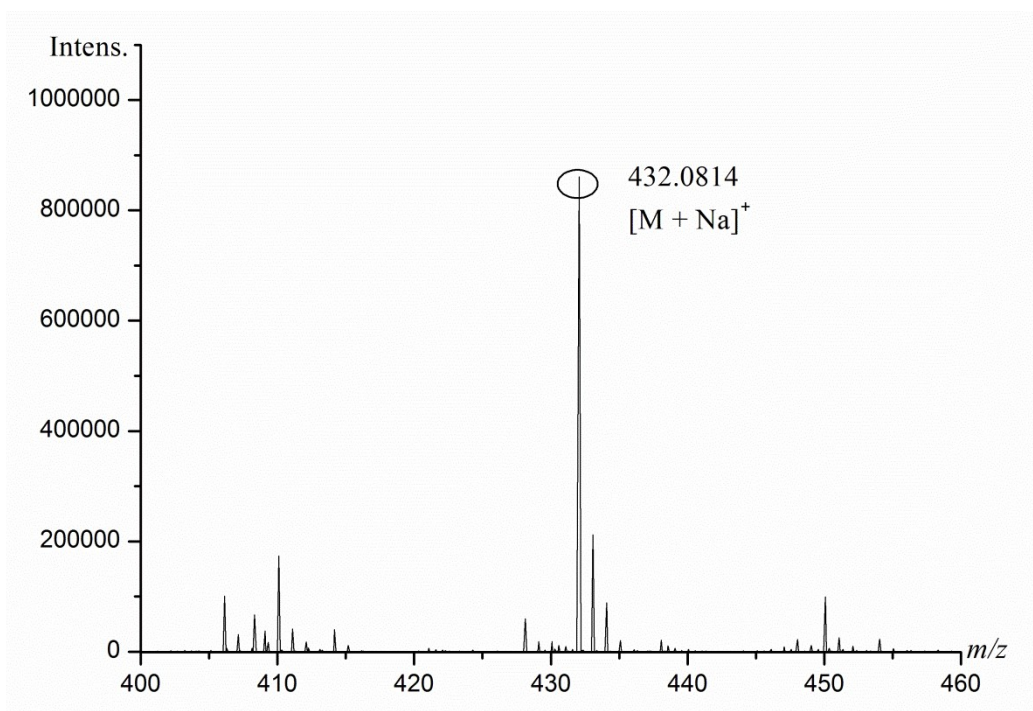

1

2

Fig.S3 HR-MS of compound EPMBs in MeOH.

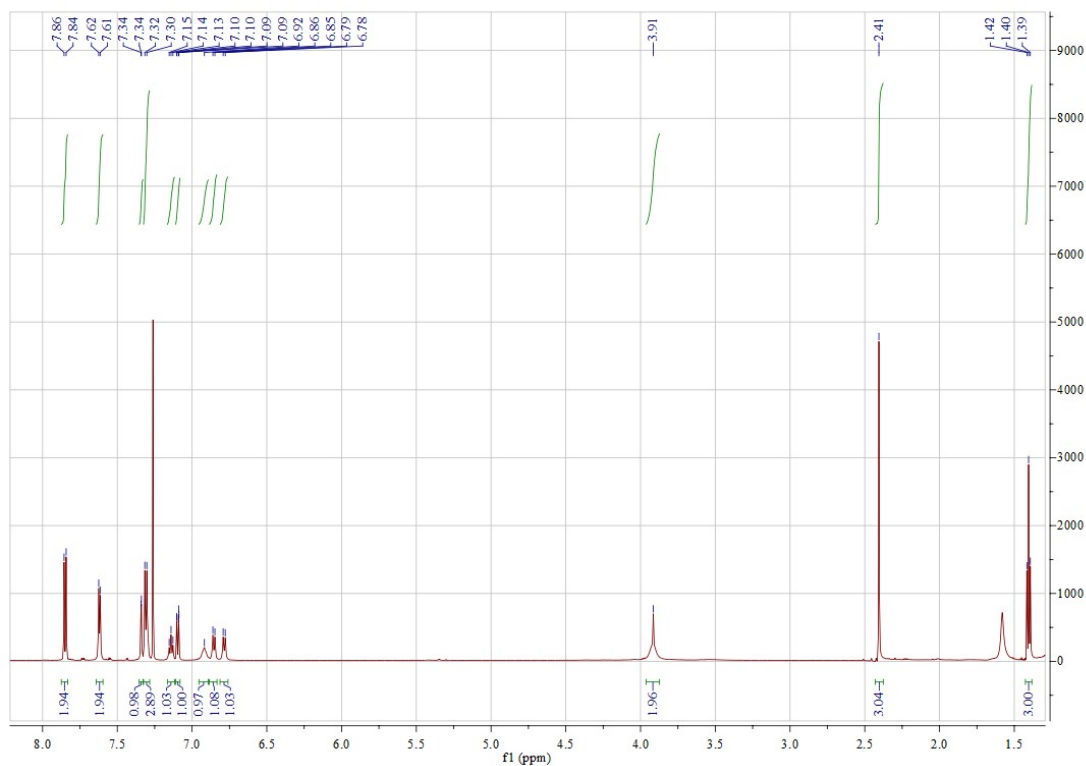

3

4

Fig. S4  $^1H$  NMR (600 MHz,  $CDCl_3$ ) of compound EPMMBS

5

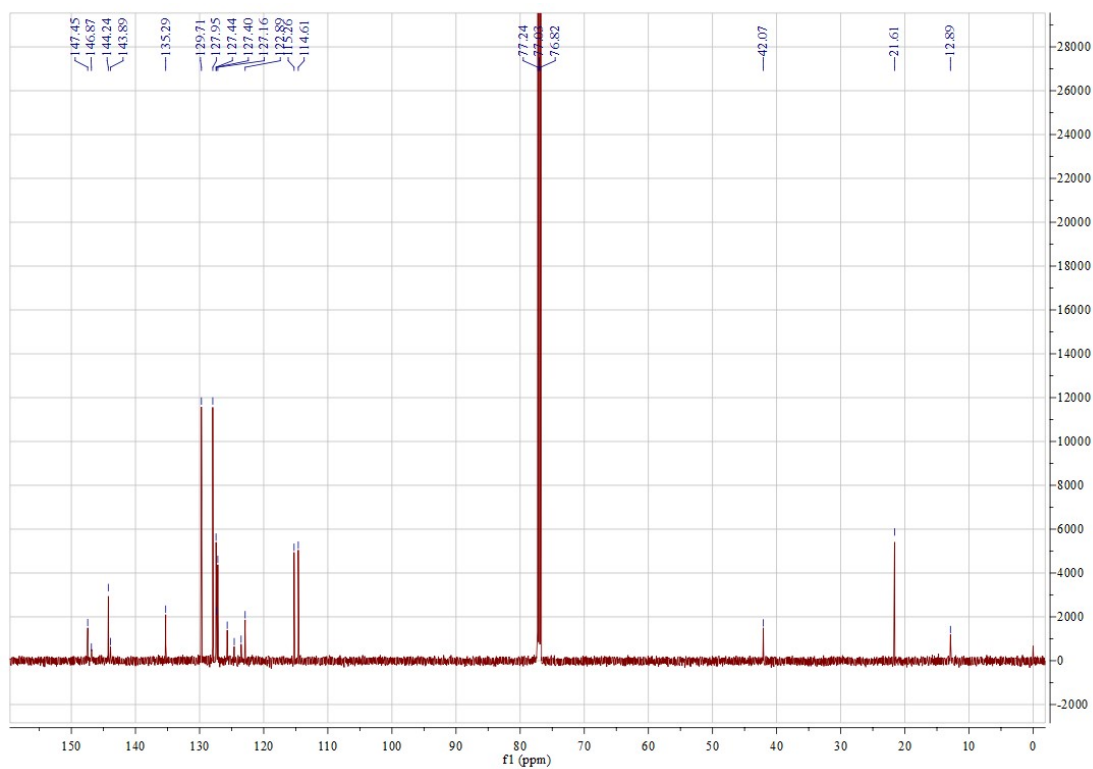

1

Fig. S5 <sup>13</sup>C NMR (151 MHz, CDCl<sub>3</sub>) of compound EPMMBS

2

3

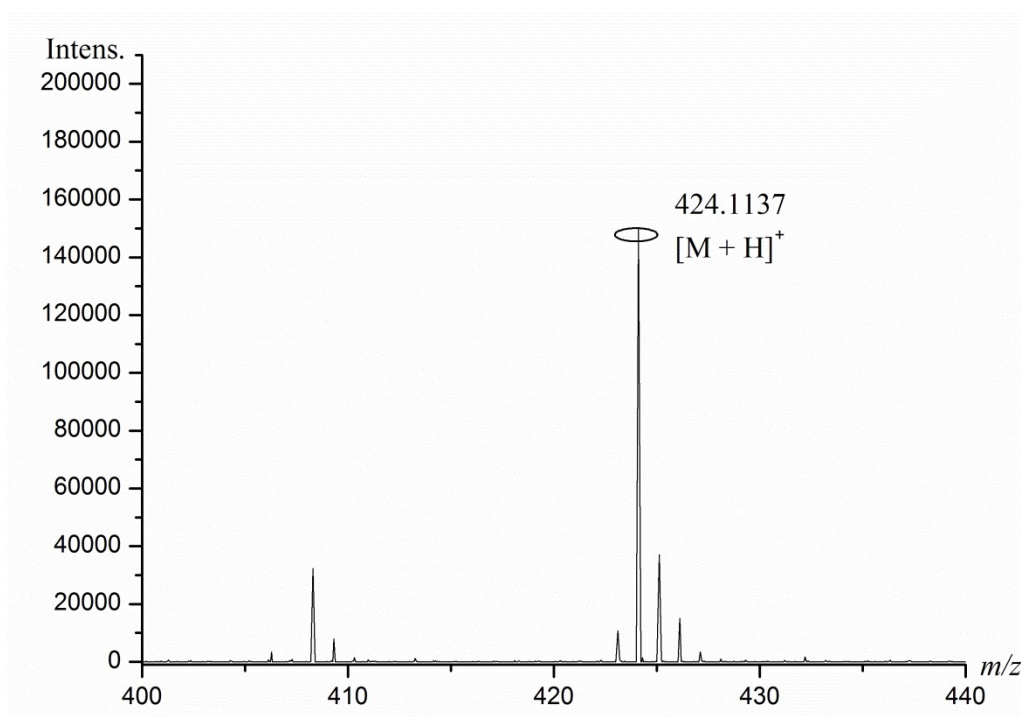

4

Fig.S6 HR-MS of compound EPMMBS in MeOH.

5

6

7

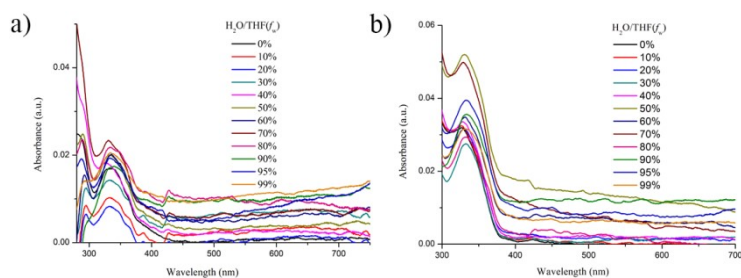

1

2 Fig.S7 UV-Vis absorption spectra of EPMBs (a) and EPMMBS (b) ( $1 \times 10^{-4}$  M) in  
 3 THF/water mixtures with different water fractions

4

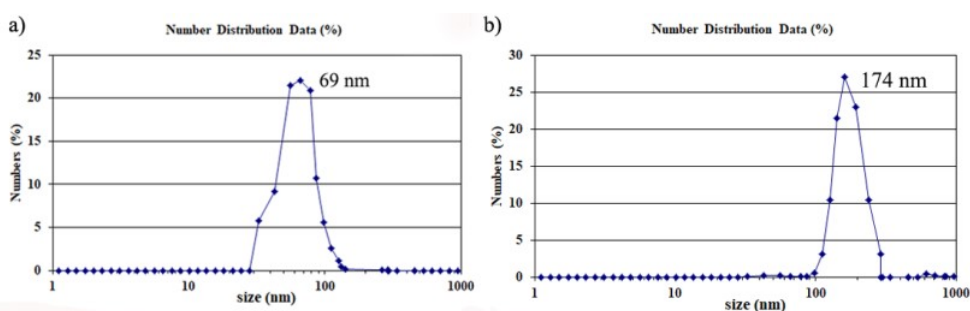

5

6 Fig.S8 DLS of EPMBs and EPMMBS in THF/H<sub>2</sub>O mixture with  $f_w = 60\%$

7

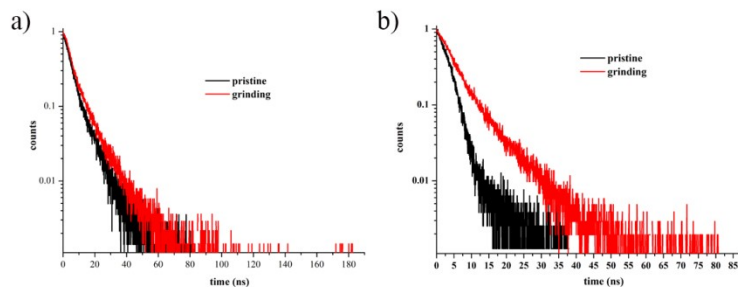

8

8 Fig.S9 the fluorescence decay curves of EPMBs (a) and EPMMBS (b) in pristine and grinding  
 9 states

9

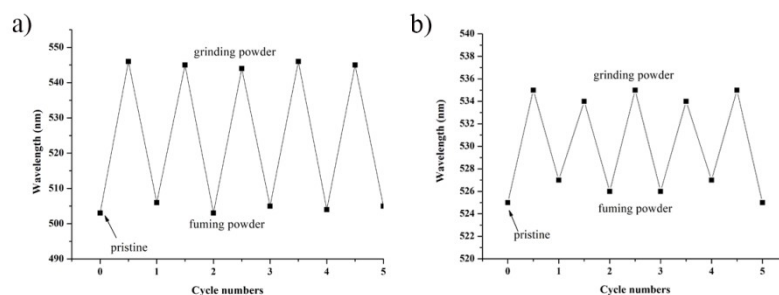

10

11 Fig.S10 Maximum fluorescent emission of EPMBs (a) and EPMMBS (b) upon repeating  
 12 treated by grinding and fuming with DCM in supporting information
